# Supplementary material for: Differential Regulation of Duplicate Light-Dependent Protochlorophyllide Oxidoreductases in the Diatom Phaeodactylum tricornutum
Source: PLOS journal article supplement (doi:10.1371/journal.pone.0158614), 2016-07-01
Supplement: S3 (10.1371/journal.pone.0158614.s003) [file journal.pone.0158614.s003]

**S3 Fig: Relationship between flow cytometric measurements of cellular fluorescence and spectrophotometric measurements of chlorophyll *a* in *P. tricornutum*.**

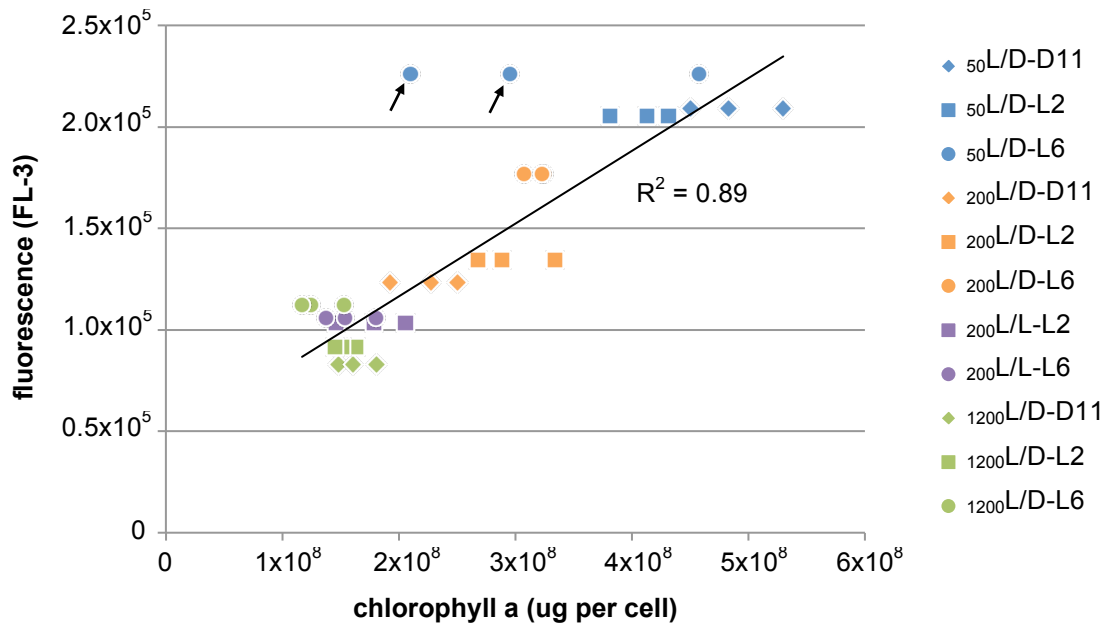

Trendline  $R^2$  value of 0.89 indicates a linear relationship between cellular fluorescence and chlorophyll *a* content determined by spectrophotometric assessment. Replicate values are plotted separately for samples from cultures maintained at  $50\mu\text{E m}^{-2} \text{s}^{-1}$ ,  $200\mu\text{E m}^{-2} \text{s}^{-1}$ , or  $1200\mu\text{E m}^{-2} \text{s}^{-1}$  that were subject to either 12h light:12h dark (L/D) or constant illumination (L/L). Samples were obtained at D11 (L/D only), L2, and L6 time points. Arrows indicate two data points excluded from linear regression.

### Methods:

Cell density and cellular fluorescence was measured on a BD Accuri C6 flow cytometer. Spectrophotometric measurements utilized flash-frozen pellets from 10mL of culture, extracted into 1.5mL 90% acetone via vortexing, 20min sonication in an ice bath, and 12h incubation at  $4^\circ\text{C}$  in the dark prior to centrifugation at  $6000 \times g$  to remove sediments. The equation of Jefferey and Humphrey [1] was utilized to determine the chlorophyll *a* content of cells.

### Reference:

1. Jeffrey SW, Humphrey GF. New spectrophotometric equations for determining chlorophyll *a*, *b*, *c*1 and *c*2 in higher plants, algae and natural phytoplankton. *Biochem Physiol Pflanz.* 1975;167: 191–194.
